# Supplementary material for: Alternative mechanisms of action for the apoptotic activity of terpenoid-like chalcone derivatives
Source: Royal Society of Chemistry journal article supplement (doi:10.1039/d1nj02086b), 2021-01-01
Supplement: d1nj02086b1.pdf [file d1nj02086b1.pdf]

## An alternative Mechanism of Action for the Apoptotic Activity of Terpenoid-like Chalcone Derivatives

Jean M. F. Custodio<sup>a</sup>; Wesley F. Vaz<sup>b</sup>; Aline Bernardes<sup>b</sup>; Andrea F. Moura<sup>c</sup>; Allen G. Oliver<sup>a</sup>; Silard Molnár<sup>d</sup>; Pál Perjési<sup>d</sup>; Caridad N. Perez<sup>d,e</sup>

<sup>a</sup> Department of Chemistry and Biochemistry, University of Notre Dame, Indiana, USA

<sup>b</sup> Departamento de Ensino, Pesquisa e Extensão, Instituto Federal de Ensino, Ciência e Tecnologia de Mato Grosso, Mato Grosso, Brazil

<sup>c</sup> Departamento de Fisiologia e Farmacologia, Universidade Federal do Ceará, CE, Brazil.

<sup>d</sup> Institute of Pharmaceutical Chemistry, University of Pécs, Pécs, Hungary

<sup>e</sup> Instituto de Química, Universidade Federal de Goiás, Goiás, Brasil

Suplementar material

**Table S1.** Molecular mass calculated and exact molecular mass.

| Compound   | Calculated Molecular mass | Exact molecular mass |
|------------|---------------------------|----------------------|
| <b>I</b>   | 298,1733                  | 298,1827             |
| <b>II</b>  | 314,1437                  | 314,1567             |
| <b>III</b> | 358,0932                  | 358,1058             |
| <b>IV</b>  | 325,1678                  | 325,1791             |

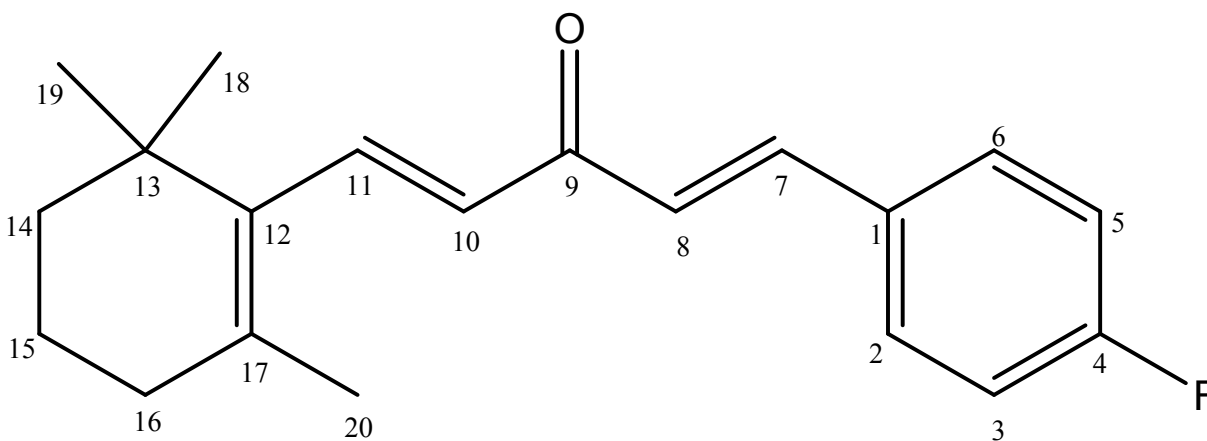

**Figure S1.** Numbering scheme used for the spectroscopic characterization

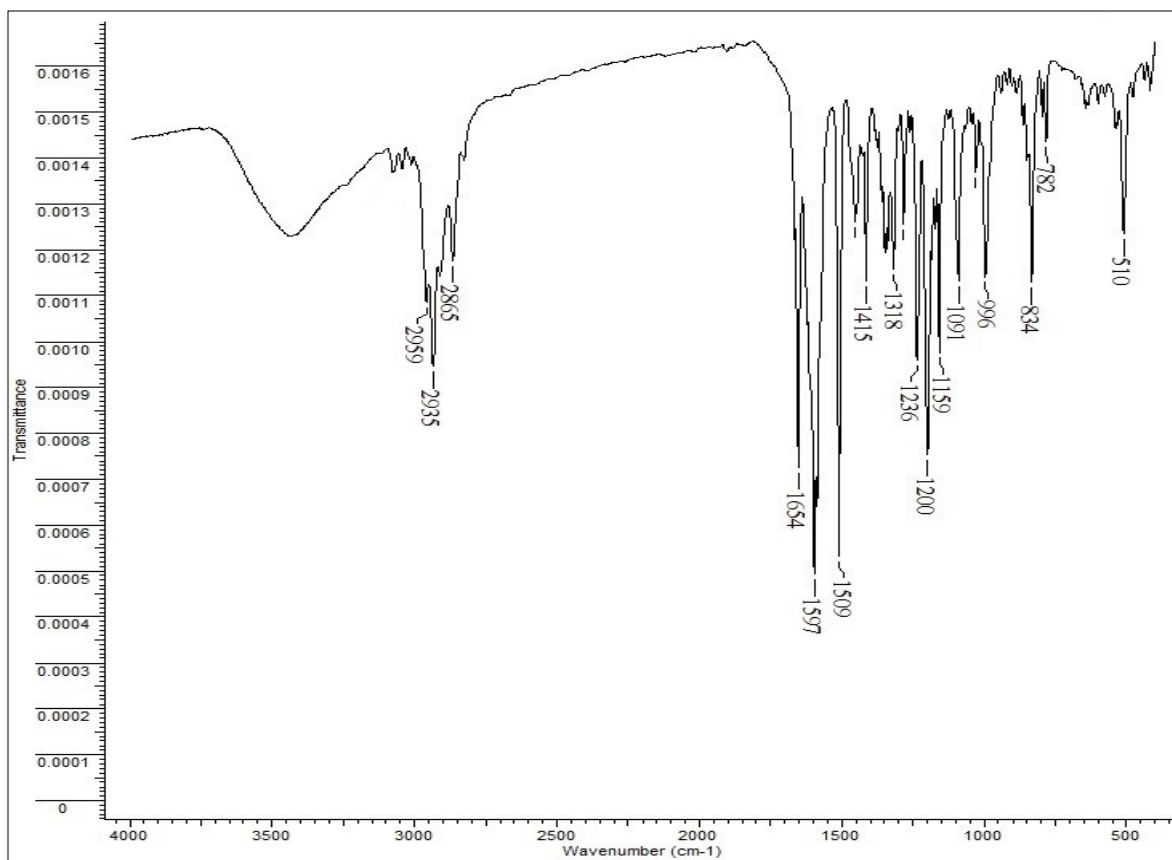

**Figure S2.** IR spectrum of compound **I** ((*1E,4E*)-1-(4-fluorophenyl)-5-(2,6,6-trimethylcyclohex-1-enyl)penta-1,4-dien-3-one).

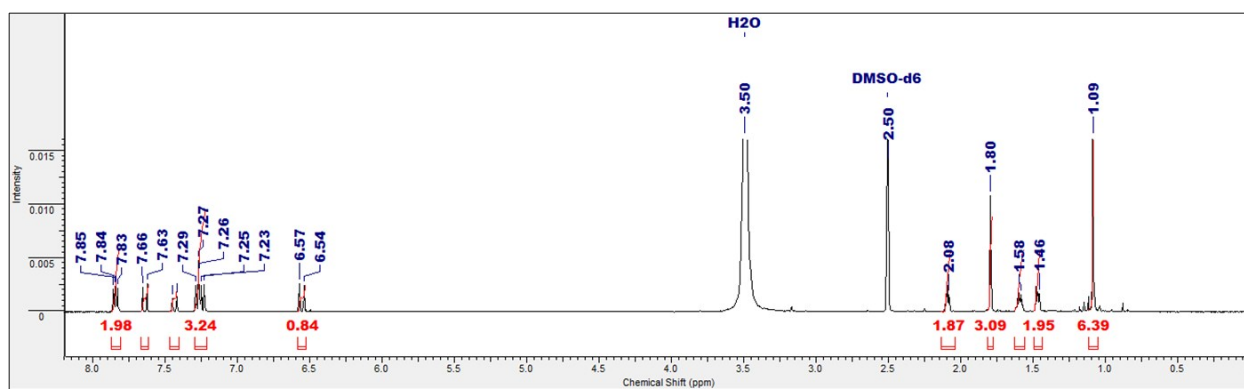

**Figure S3.**  $^1\text{H-NMR}$  spectrum of compound **I** ((*1E,4E*)-1-(4-fluorophenyl)-5-(2,6,6-trimethylcyclohex-1-enyl)penta-1,4-dien-3-one).

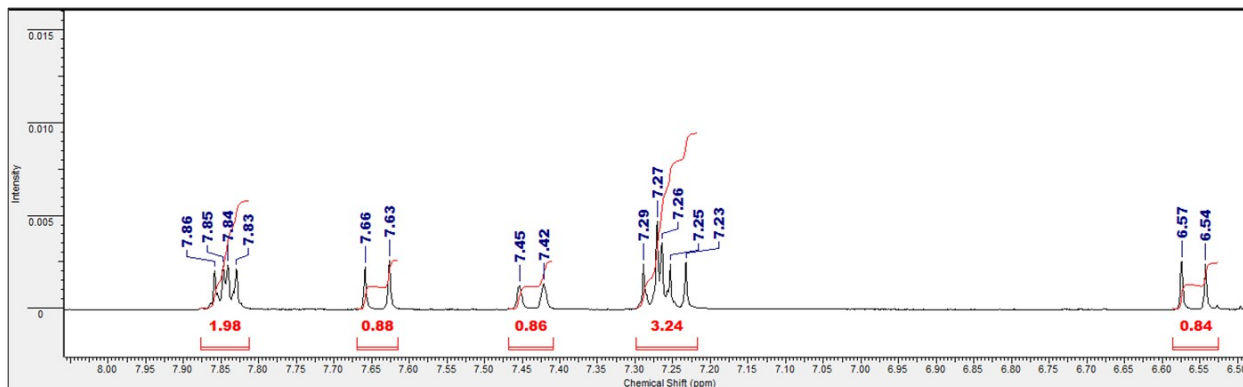

**Figure S4.** <sup>1</sup>H-NMR expanded spectrum of compound I ((1*E*,4*E*)-1-(4-fluorophenyl)-5-(2,6,6-trimethylcyclohex-1-enyl)penta-1,4-dien-3-one).

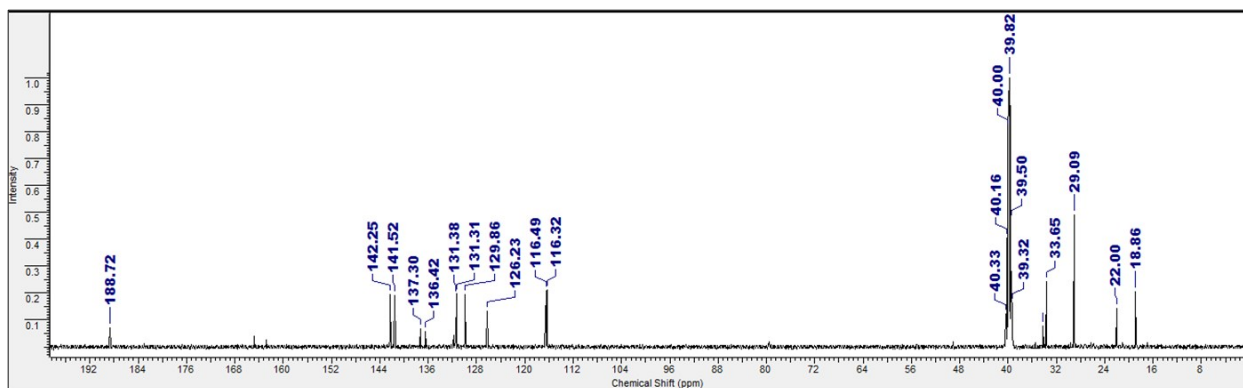

**Figure S5.** <sup>13</sup>C-NMR spectrum of compound I ((1*E*,4*E*)-1-(4-fluorophenyl)-5-(2,6,6-trimethylcyclohex-1-enyl)penta-1,4-dien-3-one).

br4f #2441 RT: 10.92 AV: 1 SB: 16 10.75-10.81 , 11.01-11.08 NL: 5.02E8  
 T: FTMS + p ESI Full ms [100.0000-1500.0000]

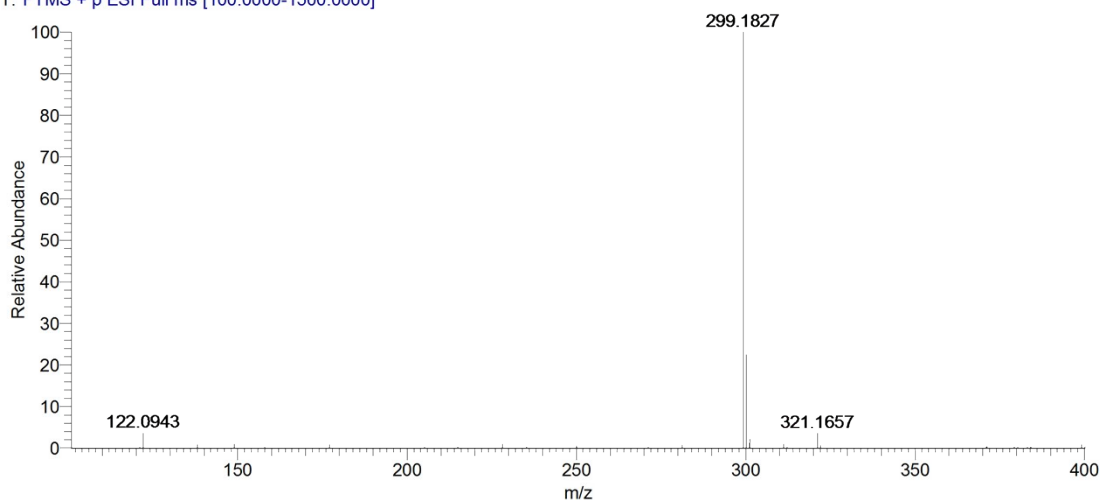

**Figure S6.** Mass spectrum of compound **I** ((1*E*,4*E*)-1-(4-fluorophenyl)-5-(2,6,6-trimethylcyclohex-1-enyl)penta-1,4-dien-3-one).

| Target        | Target Pref. Name                              | Organism               | Confidence 70% | Confidence 80% | Confidence 90% | Activity Threshold |
|---------------|------------------------------------------------|------------------------|----------------|----------------|----------------|--------------------|
| CHEMBL2390810 | Microtubule-associated protein 2               | Homo sapiens           | empty          | active         | active         | 6                  |
| CHEMBL2283    | Carbonic anhydrase II                          | Bos taurus             | empty          | active         | both           | 6                  |
| CHEMBL1907591 | Neuronal acetylcholine receptor; alpha4/beta4  | Homo sapiens           | active         | active         | active         | 5                  |
| CHEMBL4556    | Glycine transporter 1                          | Rattus norvegicus      | empty          | active         | active         | 6                  |
| CHEMBL3922    | Methionine aminopeptidase 2                    | Homo sapiens           | active         | active         | active         | 6                  |
| CHEMBL5163    | Sodium channel protein type III alpha subunit  | Homo sapiens           | active         | active         | active         | 5                  |
| CHEMBL4244    | Legumain                                       | Homo sapiens           | empty          | active         | both           | 6.5                |
| CHEMBL3891    | Calpain 1                                      | Homo sapiens           | empty          | active         | both           | 6                  |
| CHEMBL2094116 | Serotonin 3 (5-HT3) receptor                   | Rattus norvegicus      | empty          | active         | both           | 6.5                |
| CHEMBL3486    | Dihydroorotate dehydrogenase                   | Plasmodium falciparum  | empty          | active         | active         | 6                  |
| CHEMBL2411    | Serotonin 3a (5-HT3a) receptor                 | Rattus norvegicus      | empty          | active         | active         | 6.5                |
| CHEMBL2304404 | Adenosine A1 receptor                          | Cavia porcellus        | active         | active         | active         | 6                  |
| CHEMBL3242    | Carbonic anhydrase XII                         | Homo sapiens           | empty          | active         | both           | 6                  |
| CHEMBL276     | Muscarinic acetylcholine receptor M1           | Rattus norvegicus      | empty          | active         | active         | 7                  |
| CHEMBL2304402 | Phosphodiesterase 5A                           | Canis lupus familiaris | active         | active         | active         | 6.5                |
| CHEMBL2617    | Tryptase beta-1                                | Homo sapiens           | empty          | active         | active         | 6                  |
| CHEMBL2096680 | Glutamate NMDA receptor; Grin1/Grin2a          | Rattus norvegicus      | empty          | active         | both           | 5                  |
| CHEMBL5285    | Mitogen-activated protein kinase kinase 5      | Homo sapiens           | active         | active         | active         | 6.5                |
| CHEMBL3368    | Glucocorticoid receptor                        | Rattus norvegicus      | active         | active         | both           | 7                  |
| CHEMBL3712907 | Transmembrane domain-containing protein TMIGD3 | Homo sapiens           | active         | active         | active         | 6                  |

**Figure S7.** Target predicted by ChemBL for compound **I**.

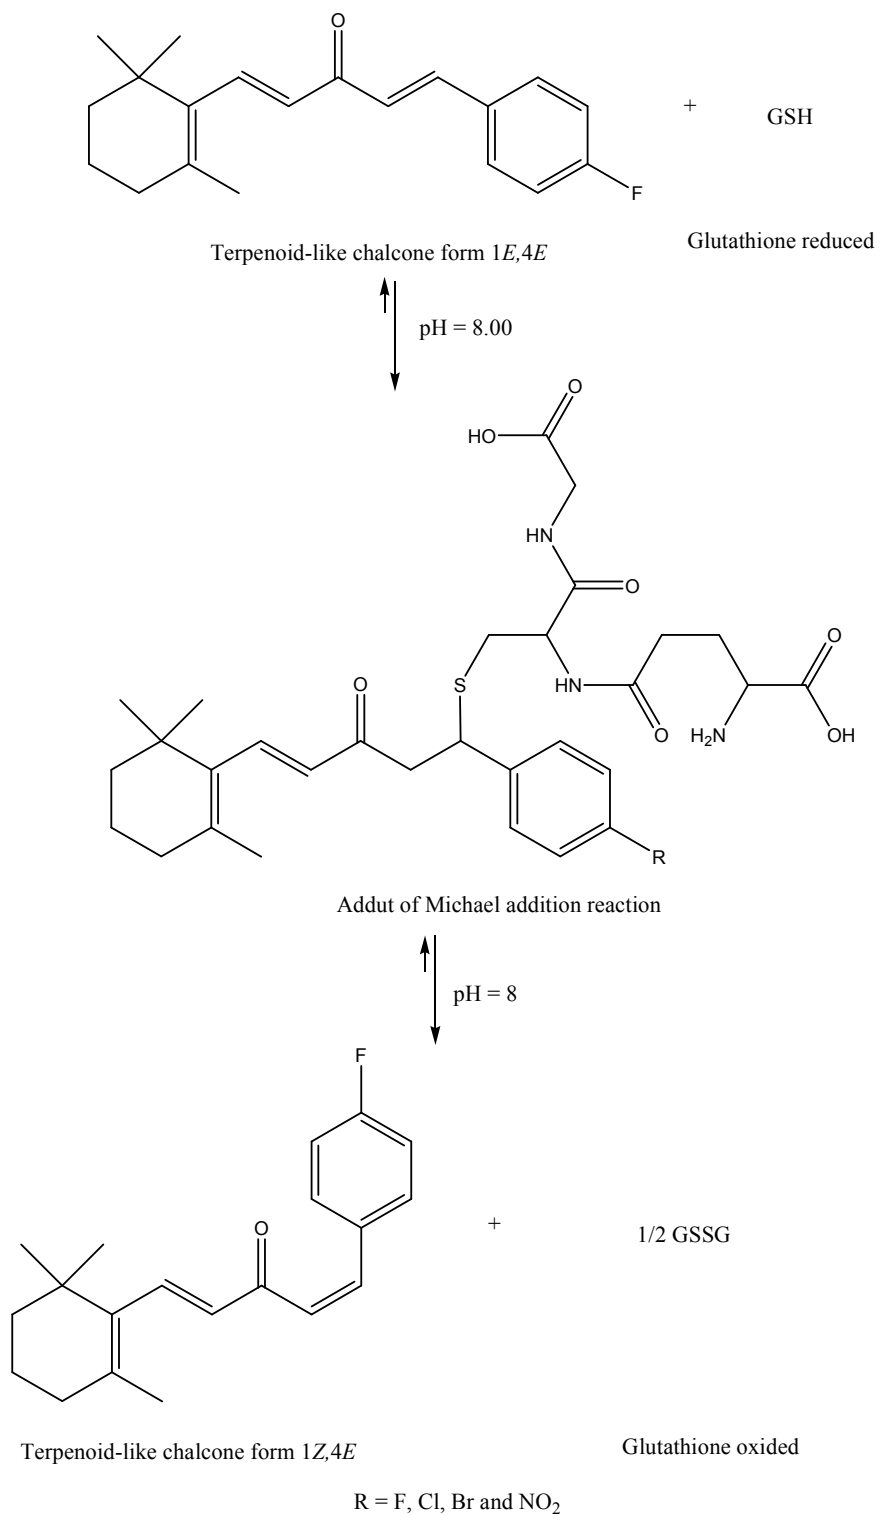

**Scheme S1.** Michael's addition reaction of GSH to retinoid-like chalcones tested.
